# Supplementary material
Source: publisher site journal article supplement (https://www.e-cmh.org/upload/media/cmh-2023-0449-Supplementary-Fig-4.pdf)
Supplement: Supplementary file 1 [file cmh-2023-0449-Supplementary-Fig-4.pdf]

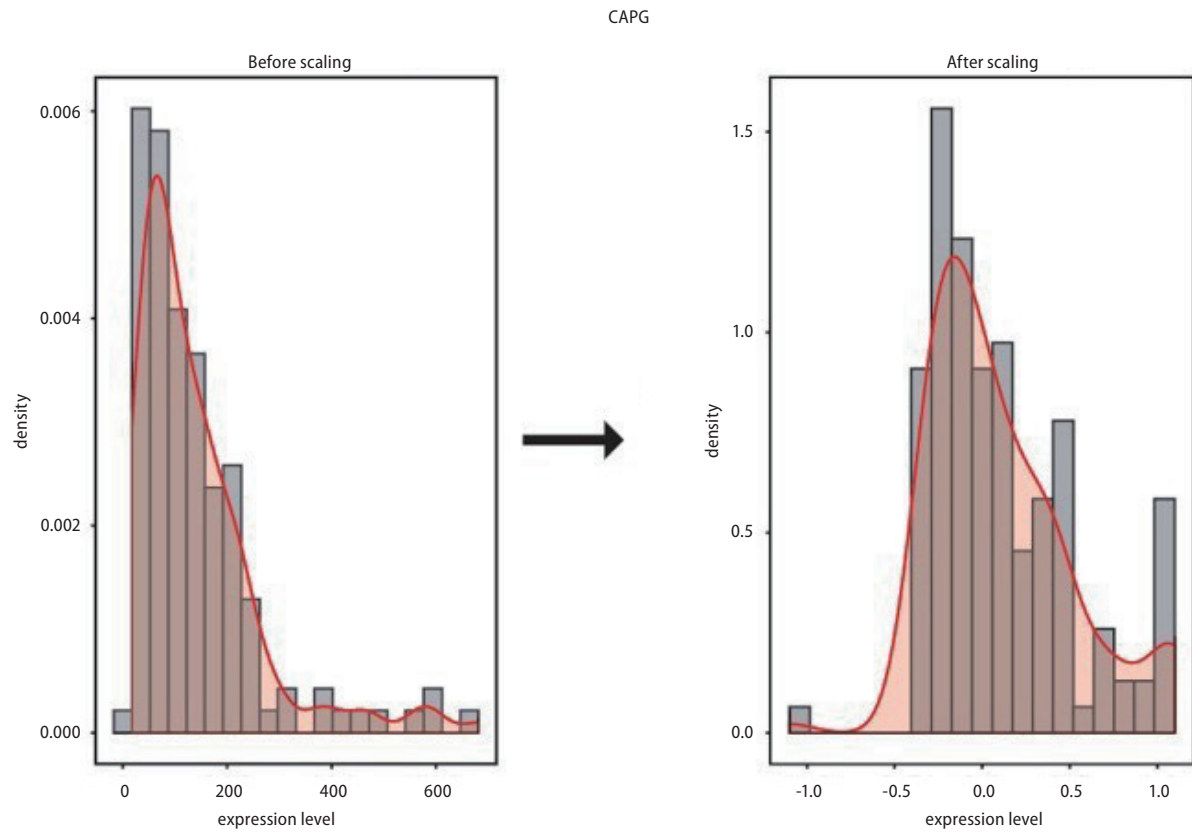

**Supplementary Fig. 4.** Density plot showing the distribution of normalized expression levels of *CAPG* before and after robust scaling. Red lines presented density curve lines by linear regression.
